# Supplementary material for: CRISP: an archive for the site characterization of permanent Italian seismic stations
Source: Springer Nature journal article supplement (doi:10.1007/s10518-023-01618-w), 2023-01-27

Online Resource 1

Complete UML diagram (entity-relation) of the CRISP database. Light blue: main entities directly referring to the seismic station; green: principal entities about site characterization; white: detailed entities linked to the principal ones. The detailed description of each field can be found in the User manual ([http://crisp.ingv.it/info\\_attachments/index](http://crisp.ingv.it/info_attachments/index), last accessed 10-10-2022).

"CRISP: an archive for the site characterization of permanent Italian seismic stations", *Bulletin of Earthquake Engineering*. By A. Mercuri, G. Cultrera, L. Minarelli, M. Quintiliani, P. Bordoni, D. Famiani, P. Casale, M. Pischiutta, C. Ladina, F. Cara, G. Di Giulio, S. Pucillo, G. Tarabusi, and INGV CRISP Working Group (S. Amoroso, R. Azzaro, R. Bianconi, S. Branca, L. Cantore, A. G. Capera, M. Cattaneo, R. Cogliano, D. Di Naccio, S. Di Prima, C. Felicetta, A. Fodarella, S. Lovati, A. G. Mandiello, C. Marocco, C. Mascandola, M. Massa, G. Milana, P. Morasca, F. Pacor, M. Paratore, V. Pessina, R. Puglia, G. Riccio, M. Santulin, A. Scaltrito, L. Scarfi, G. Tusa, M. Vassallo, L. Zuccarello).

Corresponding Author: Alessia Mercuri, [alessia.mercuri@ingv.it](mailto:alessia.mercuri@ingv.it) - Istituto Nazionale di Geofisica e Vulcanologia, Italy

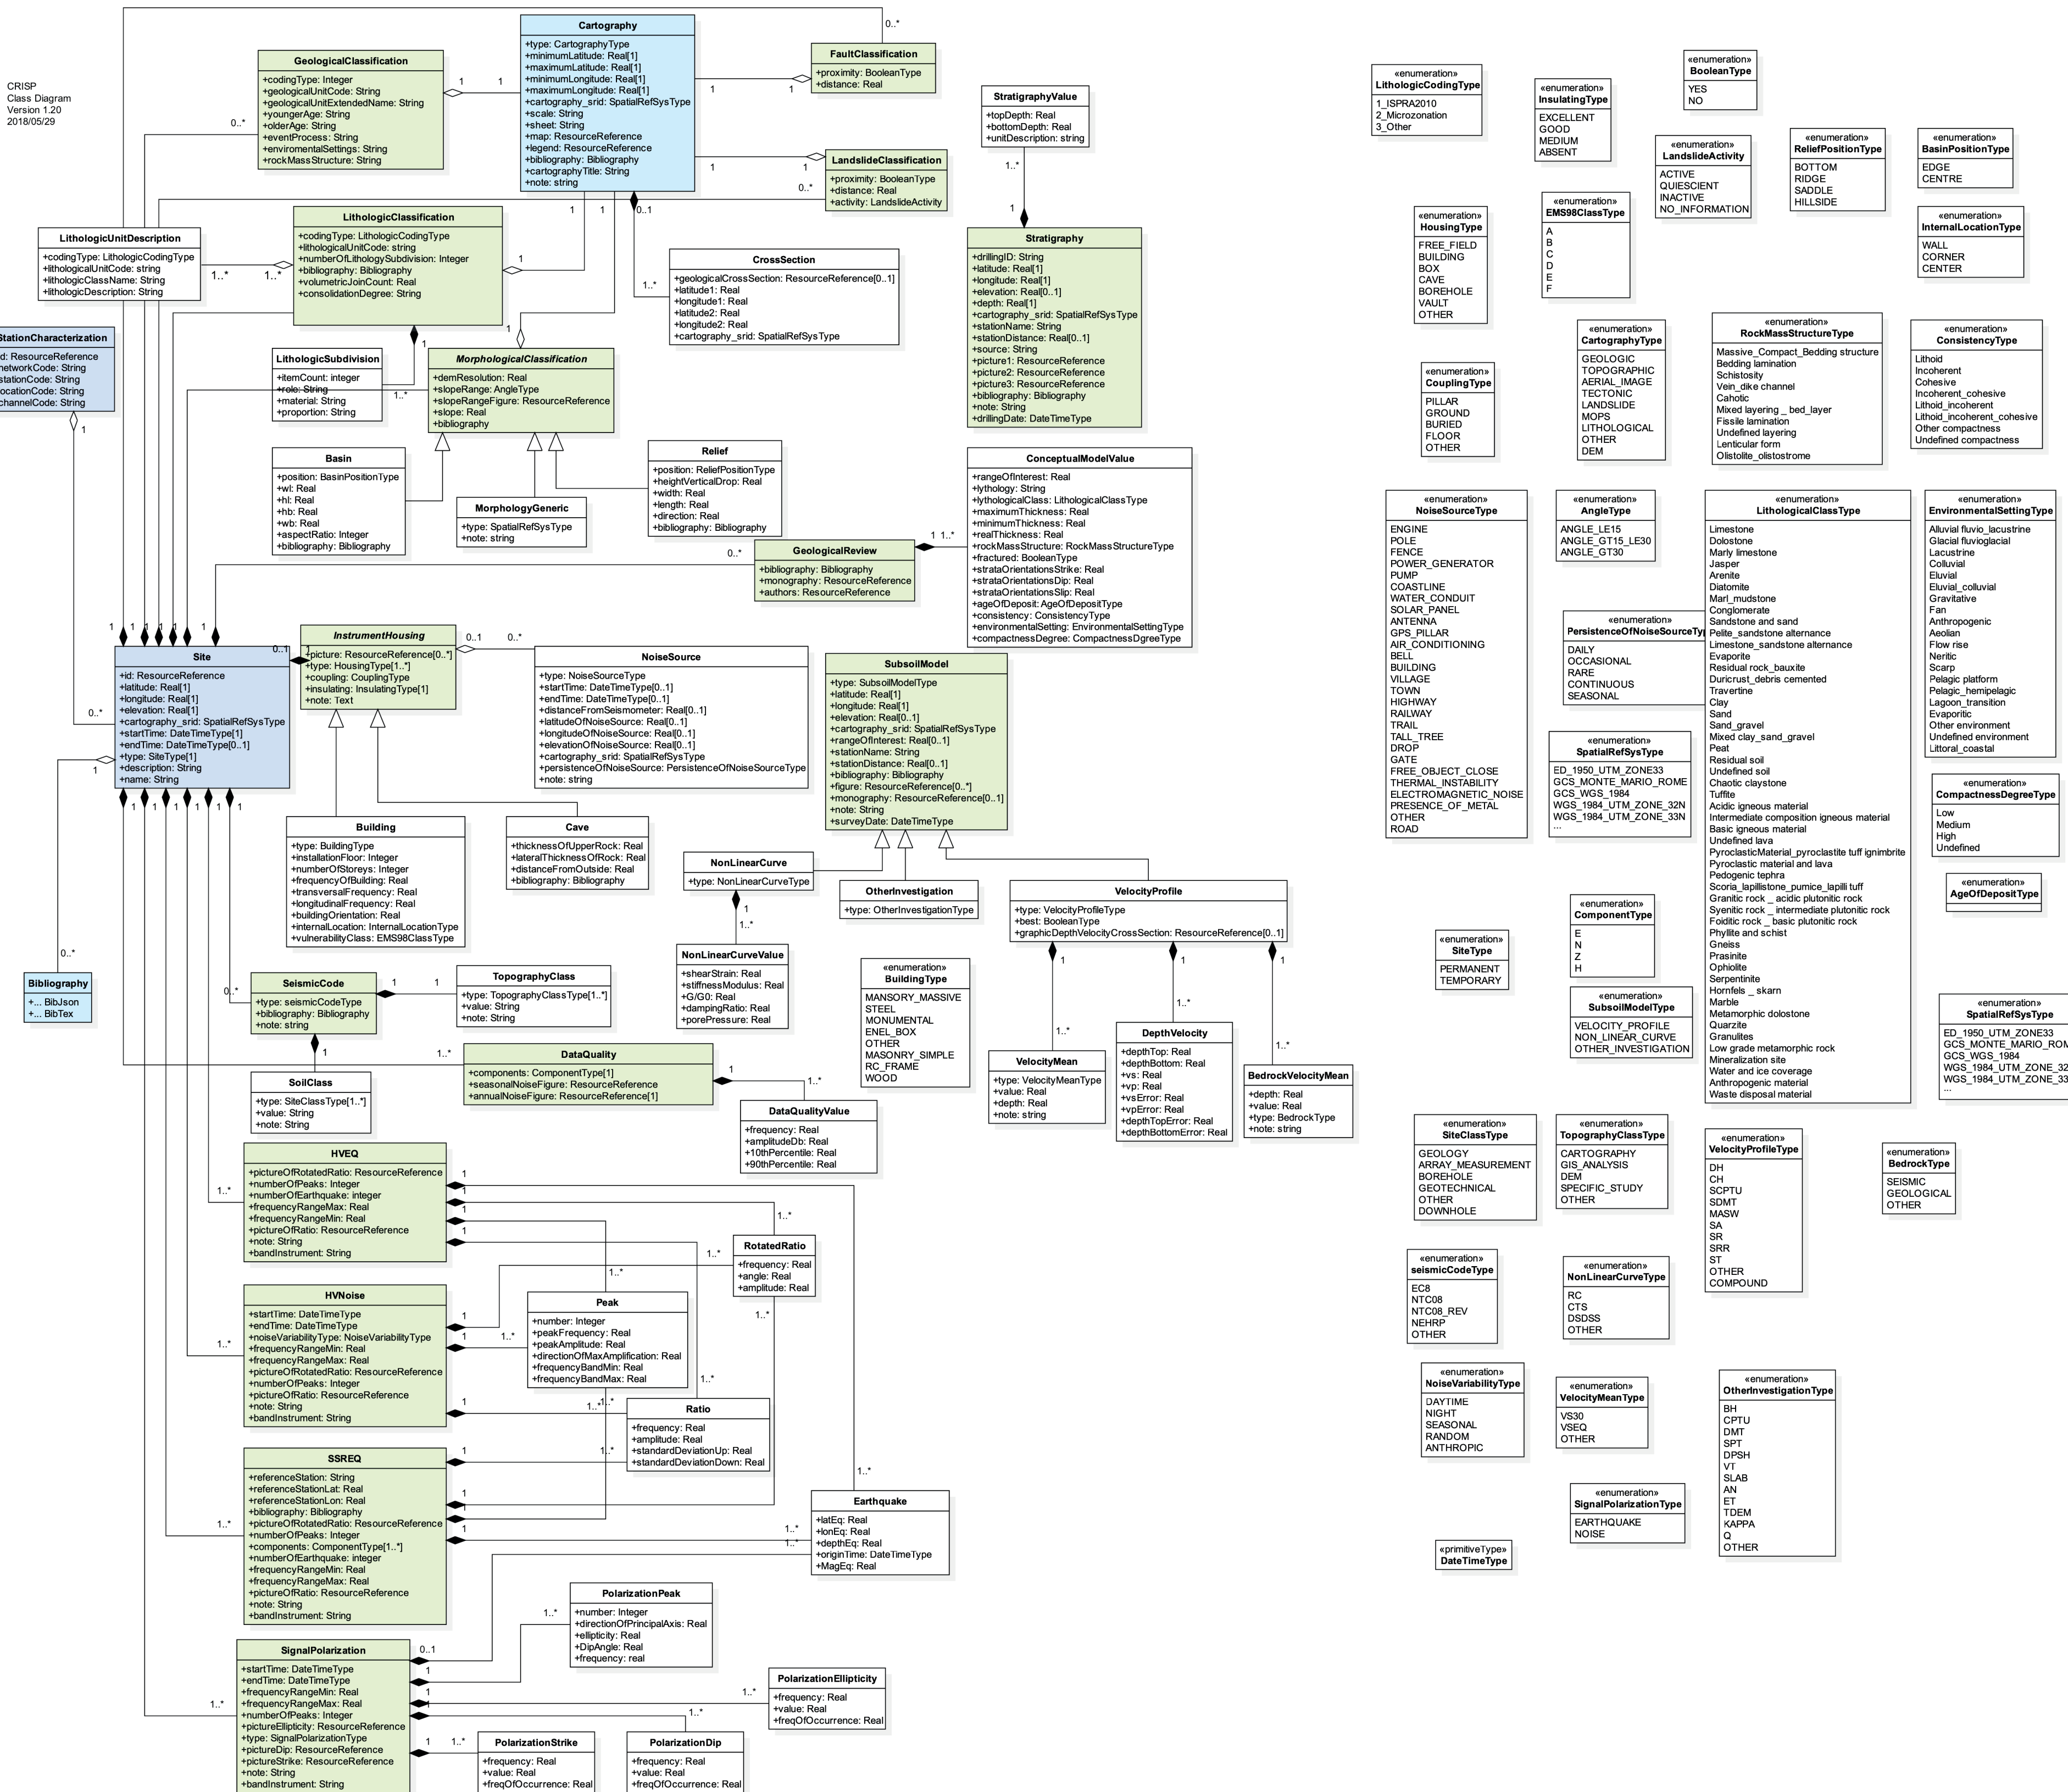

Supplement: MOESM1 [file 10518_2023_1618_MOESM1_ESM.pdf]
