# Supplementary material for: CRISP: an archive for the site characterization of permanent Italian seismic stations
Source: Springer Nature journal article supplement (doi:10.1007/s10518-023-01618-w), 2023-01-27
Supplement: MOESM2 [file 10518_2023_1618_MOESM2_ESM.pdf]

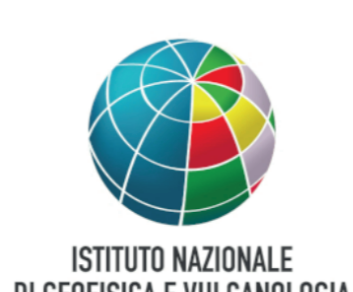

## Caratterizzazione della Risposta sismica dei Siti Permanenti della rete sismica

**CRISP**

Site characterization of the permanent seismic stations

### Site FERS

## FERS

Casaglia, Ferrara

|                                  |                                                                       |
|----------------------------------|-----------------------------------------------------------------------|
| <b>Id:</b>                       | <b>112</b>                                                            |
| <b>Spatial Reference System:</b> | <b>GCS_WGS_1984</b>                                                   |
| <b>Latitude [°]:</b>             | <b>44.903588</b>                                                      |
| <b>Longitude [°]:</b>            | <b>11.540541</b>                                                      |
| <b>Elevation [m]:</b>            | <b>7</b>                                                              |
| <b>StartTime:</b>                | <b>08/02/2013 15:00:00</b>                                            |
| <b>EndTime:</b>                  |                                                                       |
| <b>Type:</b>                     | <b>PERMANENT</b>                                                      |
| <b>Description:</b>              | <b>Casaglia, Ferrara</b>                                              |
| <b>Site Name:</b>                | <b>FERS</b>                                                           |
| <b>Sensor and digitizer:</b>     | <b>EPISENSOR-FBA-ES-T-CL-2G-FS-40-VPP(ACC); GAIA2-FS-40-VPP(DIG);</b> |

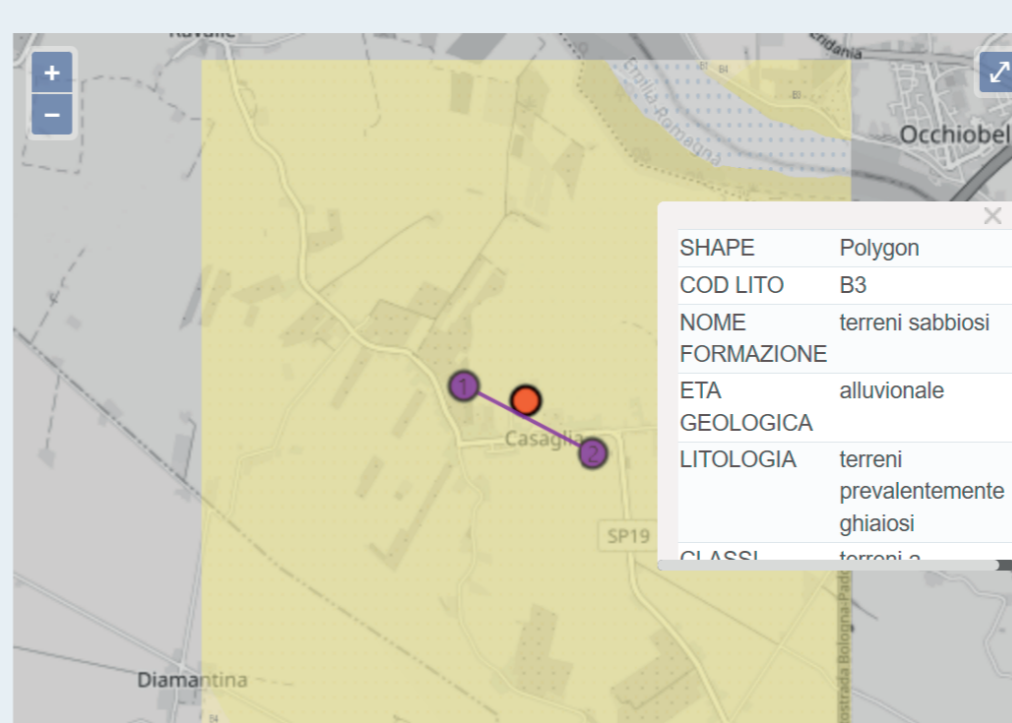

Map Layer (100k and 50k from <https://www.isprambiente.gov.it>)

- Foglio FERRARA - Carta Geologica d'Italia 1:50,000\_1
- Foglio Carta Litologica d'Italia 1:100,000 - Foglio FERRARA\_2
- Foglio FERRARA - Carta Geologica d'Italia 1:100,000\_3
- Stratigraphy Layer
- CrossSection Layer
- SubSoil Layer

### Housing

#### INSTRUMENT HOUSING

| Picture Sensor | Picture Site | Picture Panorama | Coupling | Insulating | Housing    | Note                                                                                         | Noise source |
|----------------|--------------|------------------|----------|------------|------------|----------------------------------------------------------------------------------------------|--------------|
|                |              |                  | PILLAR   | MEDIUM     | FREE FIELD | The station is placed near the cemetery wall. From Febr. 2013, only accelerometer is present | 3            |

#### DATA QUALITY

No Data Available

### Geology

#### STRATIGRAPHY

| Site name | Reference System | Latitude [°] | Longitude [°] | Drilling ID | Depth [m] | Elevation [m] | Source:                                                                                                                                                                                                                                                                                  | Site Distance [m] | Drilling Date |
|-----------|------------------|--------------|---------------|-------------|-----------|---------------|------------------------------------------------------------------------------------------------------------------------------------------------------------------------------------------------------------------------------------------------------------------------------------------|-------------------|---------------|
| FERS      | GCS_WGS_1984     | 44.903574    | 11.540505     | 185070P503  | 135       | 7             | Geological database of the Emilia-Romagna Region - <a href="https://ambiente.regione.emilia-romagna.it/it/geologia/cartografia/webgis-banchedati/banca-dati-geognostica">https://ambiente.regione.emilia-romagna.it/it/geologia/cartografia/webgis-banchedati/banca-dati-geognostica</a> | 8                 |               |

#### GEOLOGICAL REVIEW

| Bibliography                                                                                                                                                                                                                                                                                                                                                                                                                                                        | Monography | Conceptual model strata |
|---------------------------------------------------------------------------------------------------------------------------------------------------------------------------------------------------------------------------------------------------------------------------------------------------------------------------------------------------------------------------------------------------------------------------------------------------------------------|------------|-------------------------|
| Minarelli L., <b>Geological report at the seismic station IV.FERS - Casaglia, Ferrara</b> , Working group INGV "Agreement DPC-INGV 2019-21, All.B2- WP1, Task 2" (2019)                                                                                                                                                                                                                                                                                             |            | 0                       |
| Monti G. M., Martarelli L., Gafa R. M., Olivetta L., <b>Caratterizzazione geologica dei siti su cui ricadono le stazioni della Rete Sismica Nazionale dell'INGV</b> , INGV-ISPRA 2016-17 Agreement (protocol INGV 2016/0003777 of 04/04/2016): "Scientific and technical collaboration aimed at the geolithological characterization of the sites of the stations of the national INGV seismic network" (Scientific Coordinators: P. Bordini and G.M. Monti) (2016) |            | 5                       |

#### MORPHOLOGICAL CLASSIFICATION

| Cartography Title | Type  | Note | Dem Resolution [m] | Slope Range | Slope[°] | Slope Range Figure |
|-------------------|-------|------|--------------------|-------------|----------|--------------------|
|                   | BASIN |      | 30.00000           | ANGLE_LE15  | 0.34000  |                    |
|                   | BASIN |      | 10.00000           | ANGLE_LE15  | 0.11000  |                    |

#### LITHOLOGICAL CLASSIFICATION

| Cartography Title                                           | Coding type | Lithological Unit Code | Volumetric Joint Count | Consolidation Degree | Lithologic Class | Lithologic Description                                         | Number Of Lithology Subdivision |
|-------------------------------------------------------------|-------------|------------------------|------------------------|----------------------|------------------|----------------------------------------------------------------|---------------------------------|
| Foglio Carta Litologica d'Italia 1:100,000 - Foglio FERRARA | ISPRA 2010  | B3                     |                        | Unconsolidated       | Sand-gravel      | terreni a granulometria grossolana (g), media-grossolana (m+g) | 3                               |

#### GEOLOGICAL CLASSIFICATION

| Cartography Title                                   | Coding type | Geological unit code | Geological units                 | Environmental settings | Age (Older - Younger)   | Rock mass structure | Event Process       |
|-----------------------------------------------------|-------------|----------------------|----------------------------------|------------------------|-------------------------|---------------------|---------------------|
| Foglio FERRARA - Carta Geologica d'Italia 1:100,000 | ISPRA 2010  | GU_0760001_191       | terreni prevalentemente ghiaiosi | floodplain_setting     | Quaternary - Quaternary | missing             | depositionFromFluid |

#### FAULT CLASSIFICATION

No Data Available

#### LANDSLIDE CLASSIFICATION

No Data Available

#### CROSS SECTION

| Cartography                                         | Geological Cross Section | Latitude 1 [°] | Longitude 1 [°] | Latitude 2 [°] | Longitude 2 [°] | Spatial Ref Sys |
|-----------------------------------------------------|--------------------------|----------------|-----------------|----------------|-----------------|-----------------|
| Foglio FERRARA - Carta Geologica d'Italia 1:100,000 |                          | 44.904608      | 11.534829       | 44.90016       | 11.546871       | GCS_WGS_1984    |

### Seismology

#### HVEQ

No Data Available

#### HVNOISE

| Start time          | End time            | Noise variability types | Frequency range min [Hz] | Frequency range max [Hz] | Band Instrument | Picture of rotated ratio | Picture of ratio | Number of peaks |
|---------------------|---------------------|-------------------------|--------------------------|--------------------------|-----------------|--------------------------|------------------|-----------------|
| 08/07/2016 00:00:00 | 09/07/2016 00:00:00 |                         | 0.1                      | 15                       | EH              |                          |                  | 1               |

#### SSREQ

No Data Available

#### SIGNAL POLARIZATION

| Type  | Start time          | End time            | Frequency range min [Hz] | Frequency range max [Hz] | Band Instrument | Picture ellipticity | Picture dip | Picture strike | Number of peaks | Number of earthquake |
|-------|---------------------|---------------------|--------------------------|--------------------------|-----------------|---------------------|-------------|----------------|-----------------|----------------------|
| Noise | 08/07/2016 00:00:00 | 09/07/2016 00:00:00 | 0.1                      | 15                       | EH              |                     |             |                | 2               | 0                    |

### Geophysics

#### SUBSOIL MODEL

| id | Type             | Investigation | Pref. | Latitude [°] | Longitude [°] | Elevation [m] | Figure | Monography |
|----|------------------|---------------|-------|--------------|---------------|---------------|--------|------------|
| 40 | VELOCITY_PROFILE | CH            | YES   | 44.903574    | 11.540505     | 10            |        |            |

### Site Classification

#### TOPOGRAPHY CLASS

| Topography Class Type | Topography Class Value | Topography Class Preferred | Topography Class Note | Seismic Code Type | Bibliography                                                                                                                                                                 | Last Update         |
|-----------------------|------------------------|----------------------------|-----------------------|-------------------|------------------------------------------------------------------------------------------------------------------------------------------------------------------------------|---------------------|
| DEM                   | T1                     | Yes                        | dem_10m               | EC8               | Pessina, Vera and Fiorini, E., <b>A GIS procedure for fast topographic characterization of seismic recording stations</b> , Soil Dynamics and Earthquake Engineering, (2014) | 2022-02-10 10:17:23 |
| DEM                   | T1                     | No                         | dem_30m               | EC8               | Pessina, Vera and Fiorini, E., <b>A GIS procedure for fast topographic characterization of seismic recording stations</b> , Soil Dynamics and Earthquake Engineering, (2014) | 2022-02-10 10:17:36 |
| OTHER                 | T1                     | No                         | GoogleEarth           | EC8               |                                                                                                                                                                              | 2022-02-10 10:17:49 |

#### SITE CLASS

| Soil Class Type | Soil Class Value | Soil Class Preferred | Soil Class Note                                              | Seismic Code Type | Bibliography                                                                                                                                                                                                                                                                                                                                 | Last Update         |
|-----------------|------------------|----------------------|--------------------------------------------------------------|-------------------|----------------------------------------------------------------------------------------------------------------------------------------------------------------------------------------------------------------------------------------------------------------------------------------------------------------------------------------------|---------------------|
| GEOLOGY         | D                | No                   | from di Capua et al. 2016                                    | EC8               | Di Capua G., Peppoloni S., Amanti M., Cipolloni C., Conte G., <b>Site classification map of Italy based on surface geology</b> , Geological Society, London, Engineering Geology Special Publications, (2016)                                                                                                                                | 2022-02-15 10:24:06 |
| CROSSHOLE       | C                | Yes                  | Vseq =184 m/s derived from the bibliography velocity profile | NTC18             | Laurenzano G., Priolo E., Barnaba C., Gallipoli M. R., Klin P., Martelli L., Mucciarelli M., Romanelli M., <b>Studio sismologico per la caratterizzazione della risposta sismica di sito ai fini della microzonazione sismica di alcuni comuni della regione Emilia-Romagna</b> , . Rel. OGS 2013/74 Sez. CRS 26, dd. 31 luglio 2013, (2013) | 2022-02-15 10:24:07 |
| CROSSHOLE       | C                | Yes                  | Vs30=184 m/s                                                 | EC8               | Laurenzano G., Priolo E., Barnaba C., Gallipoli M. R., Klin P., Martelli L., Mucciarelli M., Romanelli M., <b>Studio sismologico per la caratterizzazione della risposta sismica di sito ai fini della microzonazione sismica di alcuni comuni della regione Emilia-Romagna</b> , . Rel. OGS 2013/74 Sez. CRS 26, dd. 31 luglio 2013, (2013) | 2022-02-15 10:24:09 |
